# Supplementary material
Source: publisher site journal article supplement (https://www.spandidos-publications.com/2731/downloadSupplementary)

Figure S1. GEF maintained the BBB integrity in the brain of AD mice. (A) Claudin-3, (B) ICAM-1 and (C) VCAM-1 mRNA expression in the hippocampus of WT (n=4), AD Tg (n=4), and AD Tg + 50 or 100 mg/kg GEF (n=4) groups of mice were estimated using RT PCR. #P<0.05 vs. WT mice; \*P<0.05 vs. AD Tg mice alone. GEF, gintonin-enriched fraction; BBB, brain-blood barrier; AD, Alzheimer's disease; WT, wild-type; RT, reverse transcription.

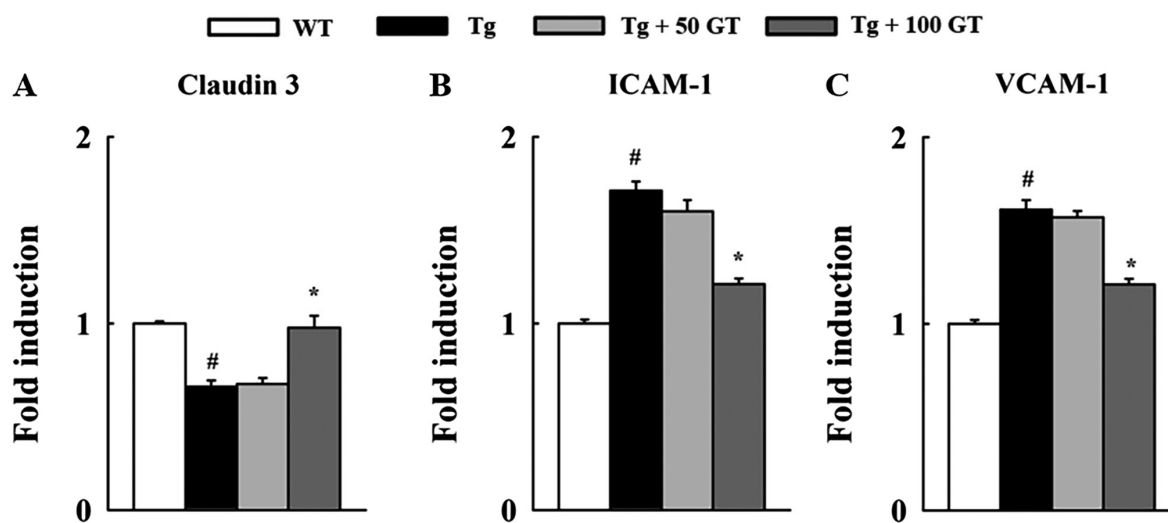

Supplement: Supplementary file 1 [file downloadSupplementary]
